# Supplementary material
Source: HighWire-hosted journal article supplement (https://erj.ersjournals.com/content/55/4/1901302)
Supplement: inline-supplementary-material-1 [file inline-supplementary-material-1.pdf]

## **Normative data for multiple breath washout outcomes in school-aged Caucasian children**

Pinelopi Anagnostopoulou, Philipp Latzin, Renee Jensen, Mirjam Stahl, Alana Harper, Sophie Yammine, Jakob Usemann, Rachel E. Foong, Ben Spycher, Graham L. Hall, Florian Singer, Sanja Stanojevic, Marcus Mall, Felix Ratjen, Kathryn A. Ramsey

### **ONLINE SUPPLEMENT**

## METHODS

### MBW measurements

Each subject was tested in a single visit and performed at least two trials. During the test the child sat in an upright position wearing a nose-clip and was asked to breath regularly through a snorkel-like mouthpiece connected to a bacterial filter (Air Safety Eco Slimline, No. 4222/01), spirette, and dead space reducer (set 2 for subjects  $\leq 35$  kg, set 3 for subjects  $> 35$  kg). The washout was stopped following at least three tidal breaths below  $1/40^{\text{th}}$  of the pre-phase end-tidal  $\text{N}_2$  concentration <sup>13</sup>.

### MBW analysis

The original temperature and pressure conditions were applied to the data and the software corrected appropriately for equipment-related dead space. The pre-capillary dead space was 33.3 ml for all measurements collected with both set 2 and set 3 <sup>29</sup>. The post-capillary dead space was either 9.5 ml for set 2 (children up to 35kg) or 22 ml for set 3 (children greater than 35kg).

#### *Differences in the analysis between Spiroware 3.1.6 and Spiroware 3.2.1*

The open-circuit hardware we used for  $\text{N}_2$ MBW (Exhalyzer D, Eco Medics AG, Duernten, Switzerland) measures  $F_{\text{N}_2}$  indirectly based on Dalton's law <sup>E1</sup>. A side-stream oxygen ( $\text{O}_2$ ) sensor and a mainstream carbon dioxide ( $\text{CO}_2$ ) sensor measure gas concentrations. These two signals must be aligned in order to allow the calculation of the  $\text{N}_2$  signal. A static synchronization method has been used in previous software versions including Spiroware version 3.1.6 <sup>E1</sup>. During a measurement, flow,  $\text{O}_2$ , and  $\text{CO}_2$  signals are not stable throughout the measurement and depend on the breathing pattern of the subject. Spiroware version 3.2.1 constantly calculates new delay times based on the breathing pattern (dynamic delay correction, DDC) <sup>E2</sup>.

Apart from the different synchronization method, the calculation method of the re-inspired  $\text{N}_2$  volume differs also between the two software versions. In Spiroware 3.1.6 this is calculated from the post-capillary dead space (number of breaths x post-capillary dead space) <sup>E3</sup>, while Spiroware 3.2.1 uses the integral between inspiratory flow and  $\text{N}_2$  concentration to calculate it <sup>E4</sup>.

### *Reloading measurements in Spiroware 3.2.1*

To ensure that our data were analyzed using the new DDC synchronization method we reloaded the raw data (recorded in Spiroware 3.1.6) into Spiroware 3.2.1. First, we performed a new synchronization of the signals by reloading the raw data (A-files) from one measurement per subject into the channel synchronization tool in Spiroware. Five consecutive breaths of good quality from the pre-washout phase were used to generate new static delay times. Each trial was then reloaded manually into Spiroware 3.2.1 to ensure calculation of the DDC was applied. The quality of the signal alignment was checked by visual control. The original temperature and pressure conditions were applied to the data and the software corrected appropriately for equipment-related dead space.

### *Quality control of MBW trials*

The following criteria were used to assess quality of the entire dataset of MBW measurements after reloading in SPW 3.2.1: no evidence of a leak, stable pre-washout phase, regular breathing pattern during the washout, and at least three consecutive breaths with the end tidal concentration of N<sub>2</sub> below 2.5% of the pre-washout phase N<sub>2</sub> concentration<sup>E3</sup>. In addition, trials with a drift in end tidal CO<sub>2</sub> concentration out of the range of 4-6% across the washout were excluded<sup>E5</sup>. Tests with at least two technically acceptable trials with FRC values within 25% of the mean were included for analysis.

## **RESULTS**

### *FRC equation*

The full regression equation for FRC is given below. The standard deviation of the residuals for the model was 0.1632.

$$\text{Ln FRC} = -18.18016 + 3.98197 \cdot \ln(\text{height}) - 0.31707 \cdot \ln(\text{weight})$$

| Univariate Analysis                | Coefficient | 95% Confidence interval | p-value          |
|------------------------------------|-------------|-------------------------|------------------|
| <b>LCI<sub>2.5%</sub></b>          |             |                         |                  |
| Height (cm)                        | -0.0053     | -0.0087; -0.0019        | <b>0.002</b>     |
| Weight (kg)                        | -0.0049     | -0.0090; -0.0008        | <b>0.020</b>     |
| Age (y)                            | -0.0225     | -0.0421; -0.0030        | <b>0.024</b>     |
| Vd/V <sub>T</sub> (%)              | 0.0258      | 0.0093; 0.0422          | <b>0.002</b>     |
| V <sub>T</sub> /FRC (%)            | 0.0040      | -0.0013; 0.0093         | 0.135            |
| Sex                                | 0.1413      | -0.0113; 0.2712         | 0.133            |
| <b>LCI<sub>5%</sub></b>            |             |                         |                  |
| Height (cm)                        | -0.0046     | -0.0070; -0.0023        | <b>&lt;0.001</b> |
| Weight (kg)                        | -0.0040     | -0.0069; -0.0011        | <b>0.007</b>     |
| Age (y)                            | -0.0178     | -0.0316; -0.0039        | <b>0.012</b>     |
| Vd/V <sub>T</sub> (%)              | 0.0160      | 0.0042; 0.0278          | <b>0.008</b>     |
| V <sub>T</sub> /FRC (%)            | 0.0073      | 0.0037; 0.0109          | <b>&lt;0.001</b> |
| Sex                                | 0.0867      | -0.0058; 0.1796         | 0.066            |
| <b>M<sub>1</sub>/M<sub>0</sub></b> |             |                         |                  |
| Height (cm)                        | -0.0009     | -0.0016; -0.0002        | <b>0.009</b>     |
| Weight (kg)                        | -0.0008     | -0.0016; 0.0002         | 0.060            |
| Age (y)                            | -0.0030     | -0.0069; 0.0009         | 0.133            |
| Vd/V <sub>T</sub> (%)              | 0.0050      | 0.0017; 0.0083          | <b>0.003</b>     |
| V <sub>T</sub> /FRC (%)            | 0.0010      | -0.0001; 0.0020         | 0.069            |
| Sex                                | 0.0274      | -0.0015; 0.0532         | 0.382            |
| <b>M<sub>2</sub>/M<sub>0</sub></b> |             |                         |                  |
| Height (cm)                        | -0.0068     | -0.0114; -0.0023        | <b>0.003</b>     |
| Weight (kg)                        | -0.0058     | -0.0114; -0.0003        | <b>0.040</b>     |
| Age (y)                            | -0.0249     | -0.0514; 0.0016         | 0.065            |
| Vd/V <sub>T</sub> (%)              | 0.0161      | -0.0066; 0.03871        | 0.164            |
| V <sub>T</sub> /FRC (%)            | 0.0147      | 0.0079; 0.0215          | <b>&lt;0.001</b> |
| Sex                                | 0.1475      | -0.02858; 0.3236        | 0.100            |
| <b>Ln FRC (L)</b>                  |             |                         |                  |
| Ln Height (cm)                     | 3.0997      | 2.9136; 3.286           | <b>&lt;0.001</b> |
| Ln Weight (kg)                     | 0.9668      | 0.8778; 1.0558          | <b>&lt;0.001</b> |
| Ln Age (y)                         | 1.1836      | 1.0857; 1.2814          | <b>&lt;0.001</b> |
| Ln Vd/V <sub>T</sub> (%)           | -0.6429     | -0.8042; -0.4815        | <b>&lt;0.001</b> |
| Ln V <sub>T</sub> (L)              | 0.6918      | 0.5694; 0.8142          | <b>&lt;0.001</b> |
| Sex                                | -0.0270     | -0.1580; 0.1039         | 0.684            |

**Supplemental Table S1:** Univariate linear regression model describing the association between lung clearance index at 2.5% ( $LCI_{2.5\%}$ ) and 5% ( $LCI_{5\%}$ ), moment ratios 1 ( $M_1/M_0$ ) and 2 ( $M_2/M_0$ ), and functional residual capacity (FRC) with demographic and physiological parameters.  $V_T/FRC$  (%): tidal volume/functional residual capacity,  $V_d/V_T$  (%): dead space volume / tidal volume.

| Multivariate Analysis              | Coefficient | 95% Confidence interval | p-value |
|------------------------------------|-------------|-------------------------|---------|
| <b>LCI<sub>2.5%</sub></b>          |             |                         |         |
| Age (y)                            | 0.04        | 0.01; 0.07              | 0.02    |
| Vd/V <sub>T</sub> (%)              | 0.07        | 0.04; 0.10              | <0.001  |
| V <sub>T</sub> /FRC (%)            | 0.02        | 0.01; 0.02              | <0.001  |
| <b>LCI<sub>5%</sub></b>            |             |                         |         |
| Age (y)                            | 0.04        | 0.02; 0.06              | <0.001  |
| Vd/V <sub>T</sub> (%)              | 0.07        | 0.05; 0.08              | <0.001  |
| V <sub>T</sub> /FRC (%)            | 0.02        | 0.01; 0.02              | <0.001  |
| <b>M<sub>1</sub>/M<sub>0</sub></b> |             |                         |         |
| Age (y)                            | 0.01        | 0.01; 0.02              | <0.001  |
| Vd/V <sub>T</sub> (%)              | 0.02        | 0.01; 0.02              | <0.001  |
| V <sub>T</sub> /FRC (%)            | 0.004       | 0.00; 0.005             | <0.001  |
| <b>M<sub>2</sub>/M<sub>0</sub></b> |             |                         |         |
| Age (y)                            | 0.07        | 0.03; 0.10              | <0.01   |
| Vd/V <sub>T</sub> (%)              | 0.10        | 0.06; 0.14              | <0.001  |
| V <sub>T</sub> /FRC (%)            | 0.03        | 0.02; 0.04              | <0.001  |
| <b>Ln FRC (L)</b>                  |             |                         |         |
| ln Height (cm)                     | 3.98        | 3.43; 4.54              | <0.001  |
| ln Weight (kg)                     | -0.32       | -0.51; -0.13            | <0.01   |

**Supplemental Table S2:** Final multiple linear regression model describing the association between lung clearance index at 2.5% (LCI<sub>2.5%</sub>) and 5% (LCI<sub>5%</sub>), moment ratios 1 (M<sub>1</sub>/M<sub>0</sub>) and 2 (M<sub>2</sub>/M<sub>0</sub>), and functional residual capacity (FRC) with demographic and physiological parameters. V<sub>T</sub>/FRC (%): tidal volume/functional residual capacity, Vd/V<sub>T</sub> (%): dead space volume / tidal volume.

## Figures

**Supplemental Figure S1:** Distribution of age, height, lung clearance index at 2.5% ( $LCI_{2.5\%}$ ) and functional residual capacity (FRC) per study center. HD indicates Heidelberg.

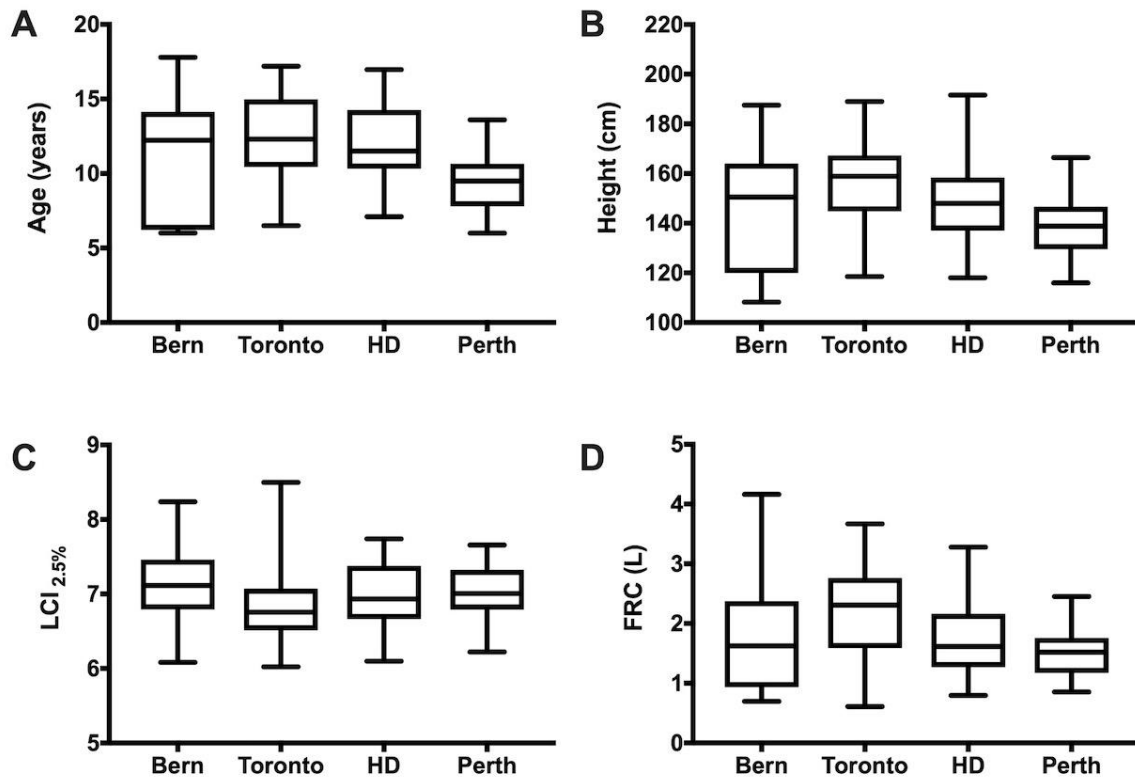

**Supplemental Figure S2:** Association of  $V_d/V_T$  (%) and  $V_T/FRC$  (%) with age, and association of LCI 2.5% with  $V_d/V_T$  (%) and  $V_T/FRC$  (%) in 180 healthy children.

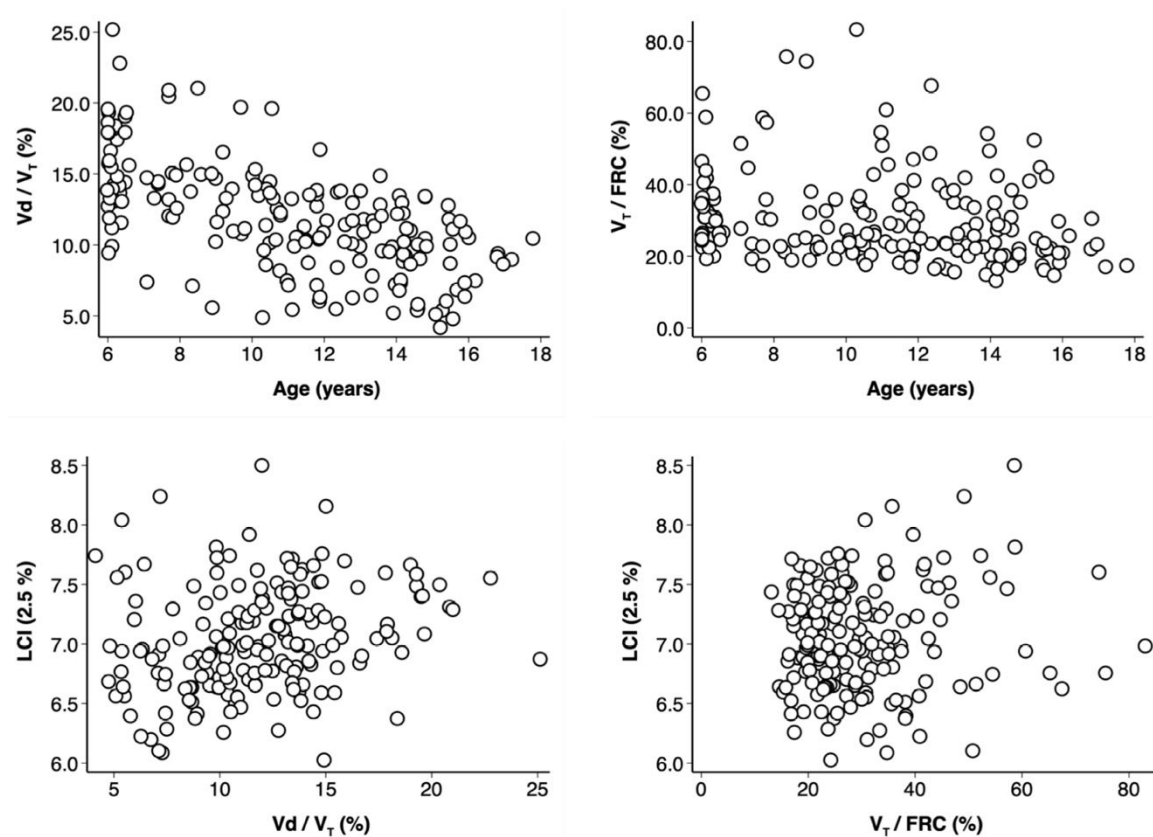



## References

- E1. Singer F, Houltz B, Latzin P, Robinson P, Gustafsson P. A realistic validation study of a new nitrogen multiple-breath washout system. *PLoS One* 2012;7(4):e36083.
- E2. Gustafsson PM, Robinson PD, Lindblad A, Oberli D. Novel methodology to perform sulfur hexafluoride (SF6)-based multiple-breath wash-in and washout in infants using current commercially available equipment. *J Appl Physiol* (1985) 2016;121(5):1087-1097.
- E3. Robinson PD, Latzin P, Verbanck S, Hall GL, Horsley A, Gappa M, Thamrin C, Arets HG, Aurora P, Fuchs SI and others. Consensus statement for inert gas washout measurement using multiple- and single- breath tests. *Eur Respir J* 2013;41(3):507-22.
- E4. Kentgens AC, Guidi M, Korten I, Kohler L, Binggeli S, Singer F, Latzin P, Anagnostopoulou P. Infant multiple breath washout using a new commercially available device: Ready to replace the previous setup? *Pediatr Pulmonol* 2018;53(5):628-635.
- E5. Jensen R, Stanojevic S, Klingel M, Pizarro ME, Hall GL, Ramsey K, Foong R, Saunders C, Robinson PD, Webster H, Hardaker K, Kane M, Ratjen F. A Systematic Approach to Multiple Breath Nitrogen Washout Test Quality. *PLoS One* 2016; 11: e0157523.
